# Supplementary material
Source: PubMed Central journal article supplement (PMC3986192)
Supplement: 1403770111_pnas.201403770SI.pdf [file 1403770111_pnas.201403770SI.pdf]

# Supporting Information

Tamir et al. 10.1073/pnas.1403770111

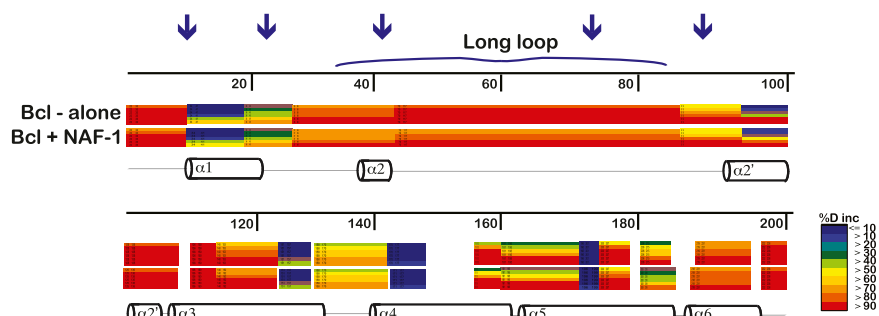

**Fig. S1.** Time-dependent deuterium incorporation into Bcl-2. Deuteration levels of probes as a function of time are colored-coded and assigned to the primary structure in Bcl-2. Regions of secondary structure known from the solution structure data are assigned below the residues. Arrows indicate peptides with significant differences in protection.

**Table S1.** Top 30 DI-ranked pairs computed with DCA for interdomain interactions of Pfam families zf-CDGSH and BH4 mapped to proteins NAF-1 and Bcl-2

| DI rank of pairs in domains<br>zf-CDGSH-BH4 | Residue in NAF-1 | Residue in Bcl-2 |
|---------------------------------------------|------------------|------------------|
| 1                                           | 99               | 13               |
| 2                                           | 101              | 13               |
| 3                                           | 80               | 20               |
| 4                                           | 103              | 21               |
| 5                                           | 105              | 20               |
| 6                                           | 96               | 26               |
| 7                                           | 112              | 23               |
| 8                                           | 108              | 13               |
| 9                                           | 110              | 13               |
| 10                                          | 114              | 13               |
| 11                                          | 94               | 7                |
| 12                                          | 111              | 13               |
| 13                                          | 115              | 15               |
| 14                                          | 104              | 13               |
| 15                                          | 99               | 23               |
| 16                                          | 80               | 21               |
| 17                                          | 80               | 13               |
| 18                                          | 109              | 29               |
| 19                                          | 115              | 23               |
| 20                                          | 101              | 23               |
| 21                                          | 105              | 30               |
| 22                                          | 89               | 19               |
| 23                                          | 92               | 7                |
| 24                                          | 109              | 14               |
| 25                                          | 103              | 20               |
| 26                                          | 115              | 7                |
| 27                                          | 105              | 21               |
| 28                                          | 101              | 20               |
| 29                                          | 99               | 20               |
| 30                                          | 99               | 21               |

DCA, direct coupling analysis; DI, direct information.

**Table S2. Top 30 DI-ranked pairs computed with DCA for interdomain interactions of Pfam families zf-CDGSH and Bcl-2 mapped to proteins NAF-1 and Bcl-2**

| DI rank of pairs in domains<br>zf-CDGSH-Bcl-2 | Residue in NAF-1 | Residue in Bcl-2 |
|-----------------------------------------------|------------------|------------------|
| 1                                             | 77               | 171              |
| 2                                             | 85               | 150              |
| 3                                             | 99               | 192              |
| 4                                             | 101              | 192              |
| 5                                             | 99               | 141              |
| 6                                             | 101              | 141              |
| 7                                             | 98               | 155              |
| 8                                             | 99               | 185              |
| 9                                             | 101              | 185              |
| 10                                            | 88               | 155              |
| 11                                            | 105              | 136              |
| 12                                            | 106              | 140              |
| 13                                            | 99               | 150              |
| 14                                            | 101              | 150              |
| 15                                            | 80               | 141              |
| 16                                            | 96               | 108              |
| 17                                            | 80               | 192              |
| 18                                            | 105              | 139              |
| 19                                            | 84               | 150              |
| 20                                            | 105              | 94               |
| 21                                            | 98               | 140              |
| 22                                            | 105              | 143              |
| 23                                            | 108              | 192              |
| 24                                            | 110              | 192              |
| 25                                            | 111              | 192              |
| 26                                            | 114              | 192              |
| 27                                            | 104              | 147              |
| 28                                            | 112              | 191              |
| 29                                            | 112              | 192              |
| 30                                            | 105              | 96               |
